# Supplementary material
Source: PubMed Central journal article supplement (PMC7684838)
Supplement: DS_10.1177_0022034520939029.pdf [file DS_10.1177_0022034520939029.pdf]

## APPENDIX

SETD1 and NF- $\kappa$ B regulate periodontal inflammation through H3K4 trimethylation

Marybeth Francis<sup>1</sup>, Gokul Gopinathan<sup>2</sup>, Anna Salapatas<sup>1</sup>, Salvadore Nares<sup>3</sup>, Marianela Gonzalez<sup>2</sup>, Thomas G.H. Diekwisch<sup>1,2\*</sup>, and Xianghong Luan<sup>1,2\*</sup>

**Table. Human and Mouse RT-PCR Primer Sequences**

| Table 1. Oligodeoxynucleotides                                  |         |                       |
|-----------------------------------------------------------------|---------|-----------------------|
| <i>Oligodeoxynucleotides for ChIP (human)</i>                   |         |                       |
| <i>IL-6</i>                                                     | Forward | AAGACATGCCAAAGTGCTGA  |
|                                                                 | Reverse | TGCAGCTTAGGTCGTCATTG  |
| <i>IL-1<math>\beta</math></i>                                   | Forward | CCAGCCAAGAAAGGTCAATTT |
|                                                                 | Reverse | GCCCTCCCTGTCTGTATTGA  |
| <i>MMP2</i>                                                     | Forward | GGTGGGTGCTTCCTTTAACA  |
|                                                                 | Reverse | AGGTCACAAAGACCCCACTG  |
| <i>Oligodeoxynucleotides for real-time PCR analysis (human)</i> |         |                       |
| <i>IL-6</i>                                                     | Forward | GAAAGCAGCAAAGAGGCACT  |
|                                                                 | Reverse | TTTTCACCAGGCAAGTCTCC  |
| <i>MMP2</i>                                                     | Forward | TGGATACCCCTTTGACGGTA  |
|                                                                 | Reverse | CTCCCAAGGTCCATAGCTCA  |

|                                 |         |                        |
|---------------------------------|---------|------------------------|
| <i>IL-1<math>\beta</math></i>   | Forward | AGTACCTGAGCTCGCCAGTG   |
|                                 | Reverse | CTGGAAGGAGCACTTCATCTG  |
| <i>SETD1</i>                    | Forward | AGATGACCATCCTGTATGACA  |
|                                 | Reverse | TCCGGAAGCTTGAGCTGGTTGA |
| <i><math>\beta</math>-actin</i> | Forward | GATGAGATTGGCATGGCTTT   |
|                                 | Reverse | CACCTTCACCGTCCAGTTT    |
| <i>P65</i>                      | Forward | ATCTGCCGAGTGAACCGAAACT |
|                                 | Reverse | CCAGCCTGGTCCCGTGAAA    |

|                                                                 |         |                       |
|-----------------------------------------------------------------|---------|-----------------------|
| <i>Oligodeoxynucleotides for real-time PCR analysis (mouse)</i> |         |                       |
| Il-6                                                            | Forward | CCGGAGAGGAGACTTCACAG  |
|                                                                 | Reverse | TCCACGATTTCCAGAGAAC   |
| Mmp2                                                            | Forward | TGGGGGAGATTCTCACTTTG  |
|                                                                 | Reverse | CCATCAGCGTTCCCATACTT  |
| Il-1 $\beta$                                                    | Forward | CAGGCAGGCAGTATCACTCA  |
|                                                                 | Reverse | TGCCTCATCCTGGAAGGTC   |
| $\beta$ -actin                                                  | Forward | AAATCGTGCGTGACATCAAAA |
|                                                                 | Reverse | TCTCCAGGGAGGAAGAGGAT  |
